# Supplementary material for: Use of Standard Webcam and Internet Equipment for Telepsychiatry Treatment of Depression Among Underserved Hispanics
Source: Atypon-hosted journal article supplement (doi:10.1176/appi.ps.201100274), 2012-12-01

# Subject Participation Flow Chart

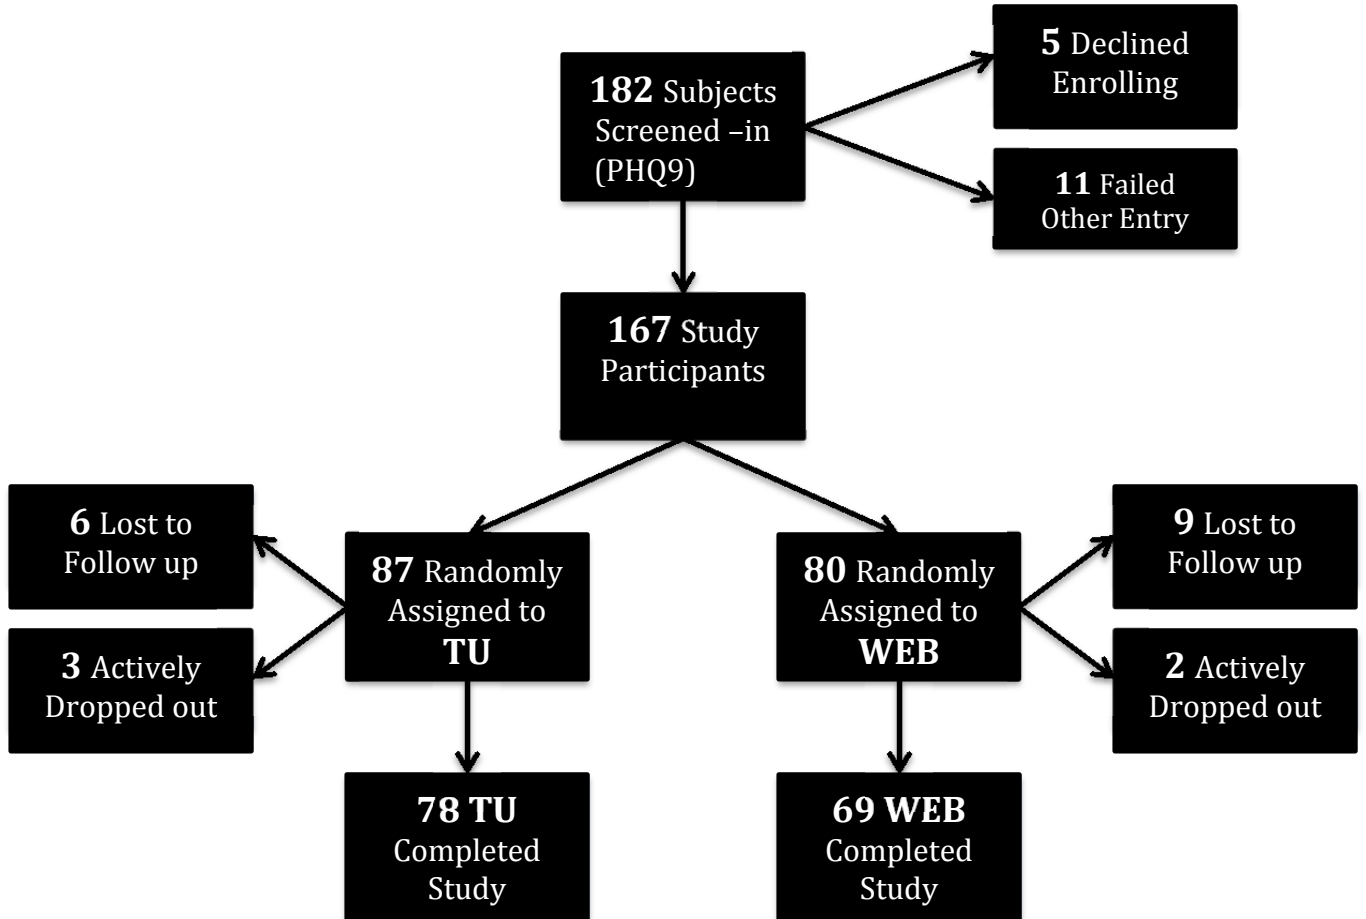

# Mean MADRS Score Change Over Time for Webcam versus Treatment as Usual

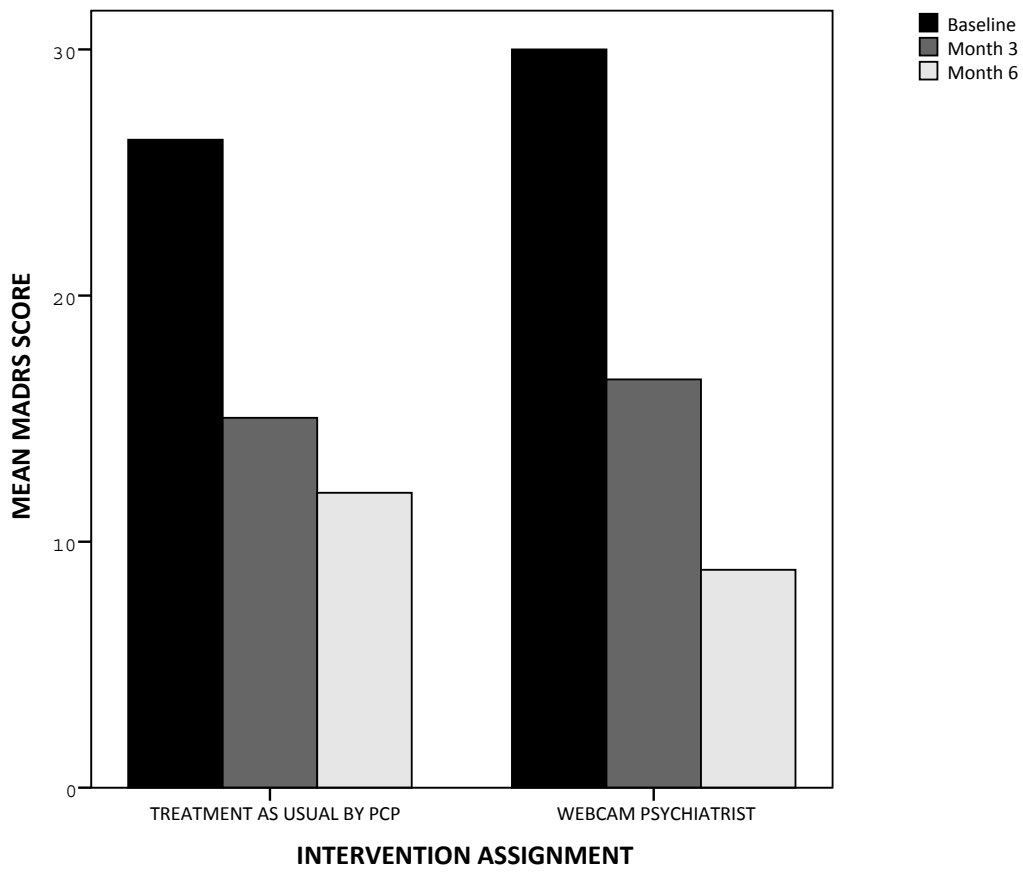

## Mean PHQ-9 Score Change Over Time for Webcam versus Treatment as Usual

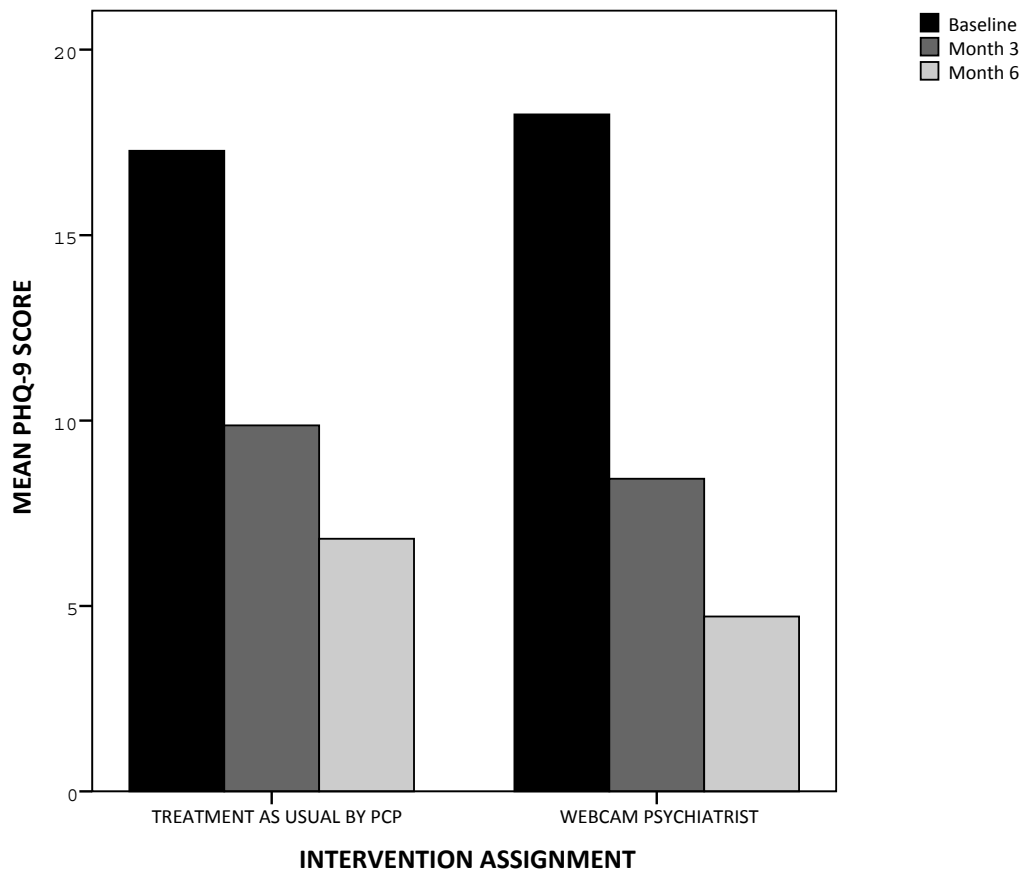

# Mean Q-LES-Q Score Change Over Time for Webcam versus Treatment as Usual

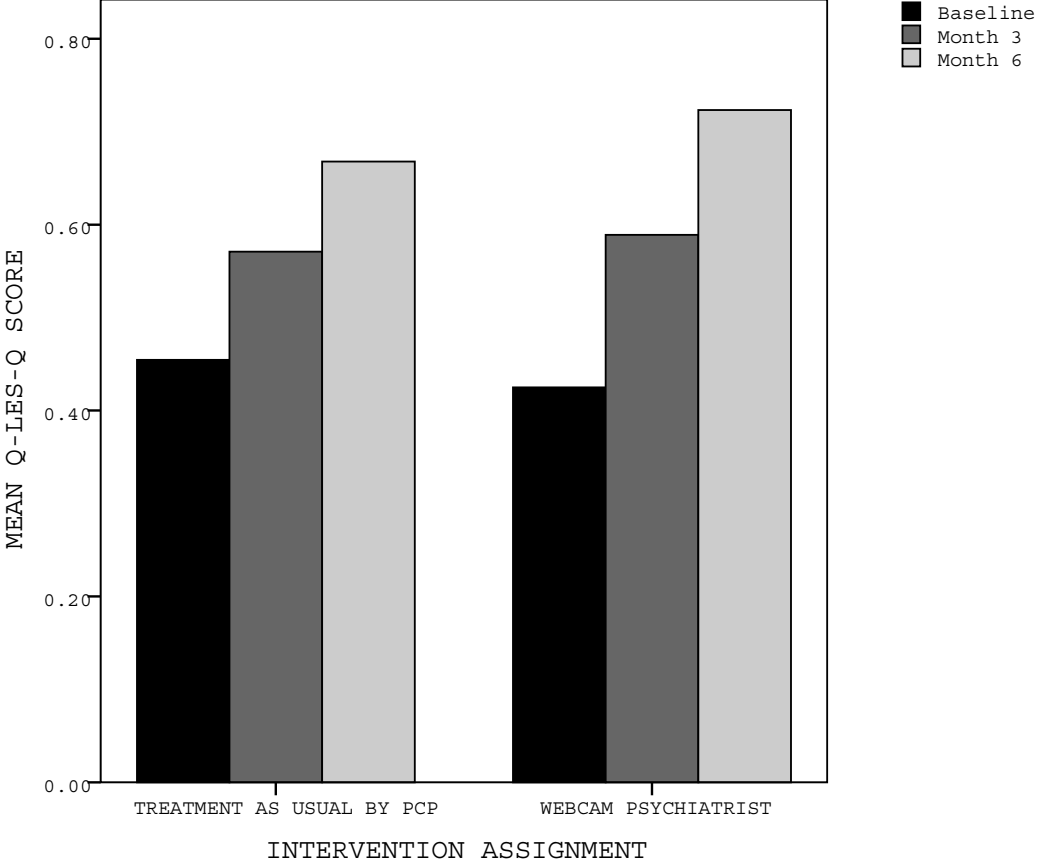

# Mean SDS Score Change Over Time for Webcam versus Treatment as Usual

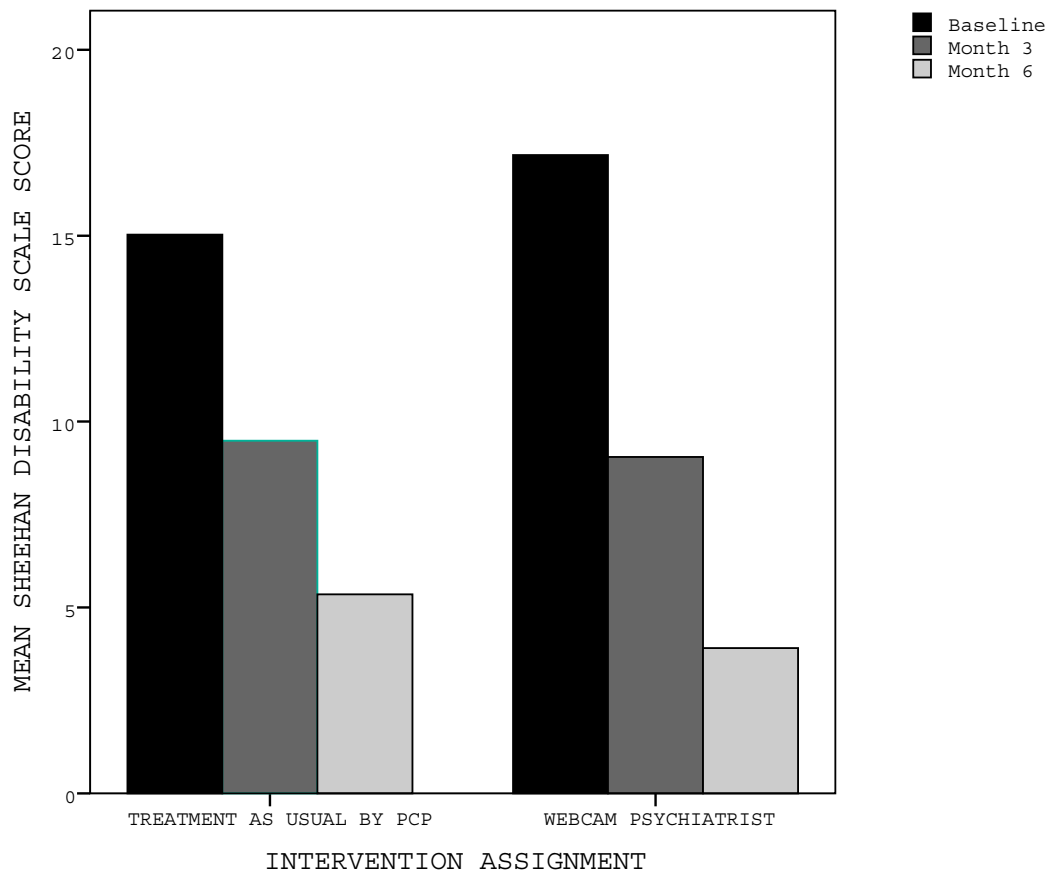

Supplement: 1213_ds001.pdf [file 1213_ds001.pdf]
